# Supplementary material
Source: PubMed Central journal article supplement (PMC3770946)

# **SAMHD1-dependent retroviral control and escape in mice**

Jan Rehwinkel, Jonathan Maelfait, Anne Bridgeman, Rachel Rigby, Bruce Hayward, Rachel A. Liberatore, Paul D. Bieniasz, Greg J. Towers, Luis Ferreira Moita, Yanick J. Crow, David T. Bonthron, and Caetano Reis e Sousa

## **Supplementary Information**

Supplementary Figure Legends

Supplementary Experimental Procedures

Supplementary References

## Supplementary Figure Legends

### **Supplementary Figure 1. Generation of SAMHD1-deficient mice**

A. *Samhd1* knockout strategy. The *Samhd1* gene is located on mouse chromosome 2 and comprises 16 exons. The region encompassing exons 1 to 3 is shown here. Step 1: We constructed the targeting vector pACYC-AGSKO5-3 by cloning the fragment between the SacII and BshT1 (=AgeI) restriction sites. We introduced (i) a loxP site into the SpeI restriction site present between exons 1 and 2 and (ii) a second loxP site together with a neomycin cassette flanked by FRT sites into the BamHI restriction site between exons 2 and 3. Gray shading indicates that these restriction sites were mutated during loxP insertion. The vector backbone contains diphtheria toxin A as a negative selection marker and was linearized with AscI before transfection into ES cells. We used two types of ES cells that have a mixed S6/B6 or pure B6 genetic background. Following selection with G418, two successfully targeted clones were selected by long-range PCR and Southern blot: clone 1F8 (mixed S6/B6) and clone 5D6 (pure B6). These clones were used to generate chimeric founder animals that successfully transmitted the targeted allele to their offspring. Step 2: Animals with one targeted *Samhd1* allele were bred with a transgenic line expressing Cre-recombinase under the ubiquitous PGK promoter, deleting exon 2 in all tissues and generating a *ko(neo)* (knockout-with-neomycin-cassette) allele. *Samhd1* *+/ko(neo)* mice were intercrossed to generate homozygous knockouts. Splicing of exon 1 to exon 3 generates a frameshift bringing a stop codon in exon 3 into frame. Step 3: *Samhd1* *+/ko(neo)* mice were bred to a line expressing Flp recombinase under the ubiquitous human beta actin promoter to delete the neomycin cassette. We used brother-sister-mating of the

resulting *Samhd1* +/- animals to produce homozygous knockout animals. *Samhd1 ko(neo)* and *ko* alleles are denoted as “-” in this manuscript and the wild-type allele as “+”.

- B. BM-DCs from littermate *Samhd1* +/+, +/- or -/- animals (derived from ES clone 5D6, neomycin cassette present) were stimulated overnight with 1000 U/ml IFN- $\alpha$ /D or left untreated. We determined *SAMHD1* mRNA levels in bulk cultures by RT Q-PCR using primers within exon 2 (left) or outside exon 2 (right). Average relative expression levels from three measurements compared to *GAPDH* mRNA are shown and error bars represent the standard deviation.
- C. BM-DCs from (B) and MEFs from Fig. 1E were tested for SAMHD1 expression by Western blot using a polyclonal mSAMHD1 anti-serum. A non-specific band is marked with an asterisk and serves as a loading control.
- D. (top) Mouse SAMHD1 has two annotated splice isoforms that use different terminal exons indicated in blue and orange. Isoform 1 (ENSMUST00000057725; CCDS16973.2) and isoform 2 (ENSMUST00000088523; CCDS50783.1) encode 658 and 651 amino acid proteins, respectively. Upon deletion of exon 2, splicing of exon 1 to exon 3 generates a frameshift bringing a stop codon in exon 3 into frame (highlighted in red). This affects both isoforms. mRNA expression of SAMHD1 isoforms was analyzed by RT-PCR using RNA from MEFs of the indicated *Samhd1* genotypes (Fig. 1E). As a negative PCR control, water was used instead of cDNA. Exons are shown as boxes and primers as horizontal arrows; primer names are in italics. The positions of start and stop codons and of the SAM and HD domains are indicated. Drawn to scale. The expected sizes of PCR products were: PCR-A, 504 bp from wild-type cDNA (both isoforms), 437 bp from exon 2 deleted knockout cDNAs; PCR-B1, 1642 bp from wild-type isoform

1 cDNA, no product from isoform 2 and exon 2 deleted cDNAs; PCR-B2, 1621 bp from wild-type isoform 2 cDNA, no product from isoform 1 and exon 2 deleted cDNAs. (bottom) PCR products were loaded on an agarose gel and visualized with SYBRsafe (Invitrogen).

- E. MEFs from Fig. 1E were tested for SAMHD1 expression and localization by immunofluorescence using the polyclonal mSAMHD1 anti-serum or pre-immune serum as a control (bottom). Nuclei were visualized with DAPI staining.
- F. *Samhd1* +/- animals were crossed and the genotype of the offspring was determined by PCR. Numbers of *Samhd1* +/+, +/- or -/- animals born to heterozygous breeders are shown for the pure B6 and mixed S6/B6 background, with the neomycin cassette (neo) present or not as indicated. These data were compiled into Fig. 1A.

**Supplementary Figure 2. Inflammatory responses induced by *E. coli* DNA in SAMHD1-depleted BM-DCs**

- A. Wild-type B6 BM-DC cultures were infected with lentiviral vectors expressing shRNA targeting SAMHD1 or control scrambled shRNA (scr). Transduced cells were selected with puromycin and *SAMHD1* mRNA levels were determined by RT Q-PCR.
- B. Wild-type B6 BM-DC cultures were depleted of SAMHD1 as in (A) and then transfected or not with *E. coli* DNA. The indicated mRNAs were assessed by RT Q-PCR.

(A-B) Relative expression levels compared to *GAPDH* mRNA from three (A) or two (B) measurements are shown and error bars represent the standard deviation (A) or range (B).

**Supplementary Figure 3. IFN production is not detectable after infection with HIV-1-GFP**

BM-DCs of the indicated *Samhd1* genotypes were infected with VSV-G pseudotyped HIV-1-GFP (pRRLsin.eGFP / pCMV $\Delta$ 8.2) using different multiplicities of infection (MOI). 48 hours after infection, supernatants were transferred to the NIH3T3-ISRE-GFP reporter cell line stably expressing GFP under the control of an IFN inducible promoter. The fraction of GFP-expressing reporter cells was determined by flow cytometry after 24 hours. IFN-A/D served as a standard at the indicated concentrations. Averages from three DC cultures per group from independent mice are shown and error bars represent the standard deviation. The IFN-A/D standard was done in duplicate and error bars represent the range. Cells and mice were on the B6 background (5D6).

**Supplementary Figure 4. Retroviral transduction of SAMHD1 deficient cells.**

A. Cells freshly isolated from whole spleens were transduced with the indicated retroviral vectors. After overnight incubation, GFP and CD11c expression was analyzed by flow cytometry. The number of GFP<sup>+</sup>CD11c<sup>+</sup> cells per spleen was calculated. Averages from three different spleens per group are shown and error bars represent the standard deviation.

- B. Fresh bone marrow from mice of the indicated *Samhd1* genotypes was transduced by spin-infection with undiluted 293T supernatants containing the indicated retroviral vectors or medium alone as a negative control (mock). Supernatant containing the pCSGW / p8.91 based HIV-1-GFP vector was also diluted 1:10 prior to infection (right). Cells were cultured with GM-CSF for 6 days and GFP expression was determined by flow cytometry.
- C. Immortalized MEFs of the indicated *Samhd1* genotypes were infected with different GFP-expressing retroviral vectors. Two days later, transduction was analyzed by flow cytometry. Each histogram corresponds to one MEF cell line from an individual embryo; numbers in square brackets refer to the cell line identifier (right).
- (A-C) Cells and mice were on the B6 background (5D6).

**Supplementary Figure 5. HIV-1-GFP transduction of BM-DCs.**

Representative FACS plots corresponding to Fig. 6B are shown.

**Supplementary Figure 6. FACS analysis of *in vivo* transduced splenocytes**

Fresh splenocytes were stained for surface expression of NK1.1, CD3, CD11b and Gr-1 (stain I, top) or B220, CD11c, MHCII and F4/80 (stain II, bottom). Cells staining positive with DAPI were excluded from the analysis. Autofluorescent cells were included for the analysis of F4/80<sup>+</sup> macrophages (bottom), but were otherwise excluded.

**Supplementary Figure 7. *In vivo* infection with HIV-1-GFP (pCSGW / p8.91).**

C57BL/6 wild type and SAMHD1-deficient (5D6) animals were injected intravenously with HIV-1-GFP (pCSGW / p8.91,  $10^8$  293T infectious units). Five days later, transduction of splenocytes was analyzed by flow cytometry. GFP expression in total spleen cells and in the indicated splenocyte subsets was analyzed after pre-gating on DAPI negative cells. T, T-cells; NK, NK-cells; Mono, inflammatory monocytes; Neut, neutrophils; B, B-cells; DC, dendritic cells; pDC, plasmacytoid dendritic cells. The differences between the samples from *Samhd1*<sup>+/+</sup> and *Samhd1*<sup>-/-</sup> mice are not statistically significant.

**Supplementary Figure 8. Alignment of human and mouse SAMHD1**

Human and mouse SAMHD1 protein sequences were downloaded from ensemble.org (hSAMHD1: ENSP00000262878; mSAMHD1 isoform 1: ENSMUSP00000059717, isoform 2: ENSMUSP00000085880) and aligned with DNASTAR MegAlign software using the Clustal W method. The sequence of the human protein is shown in white on black background. Identical amino acids in mouse SAMHD1 are highlighted in the same way, while non-identical residues are shown in black on white background. The CDK1 phosphorylation site T<sub>592</sub>PQK in human SAMHD1 is marked by a red line. A similar site matching the CDK1 consensus sequence S/T-P-X-K/R is present in mouse SAMHD1 isoform 1.

**Supplementary Figure 9. Mouse SAMHD1 escapes Vpx-mediated degradation**

- A. PMA-differentiated human THP1 cells were treated with medium only or with virus-like particles (VLPs) that do or do not contain Vpx for 24 hours. hSAMHD1 and actin protein levels were assessed by Western blot using antibodies against hSAMHD1 and actin.
- B. Mouse BM-DMs or BM-DCs were treated with the same VLPs as in (A) for 24 hours. mSAMHD1 protein levels were assessed by Western blot using a polyclonal mSAMHD1 anti serum. The membrane was re-probed with an  $\alpha$ -actin antibody as a loading control.



## Supplementary Experimental Procedures

### **Generation of SAMHD1-deficient mice**

#### Targeting vector

The mouse 129 strain PAC library RPCI-21 (Osoegawa et al, 2000) was screened with a radioactive probe YC1 (chr2:156954584-156955773; using oligonucleotides YC-1F and YC-2R) to identify a clone (PAC 567N18) containing the target region of *Samhd1*. A BshTI (=AgeI) + SacII digest was performed to clone the fragment chr2:156951255-156960865, which contains exons 1-3 of *Samhd1*, into a pUC19 vector (Yanisch-Perron et al, 1985) modified to contain AscI, SacII, BshTI, XhoI and NotI sites to create plasmid pYC-AGS15. In order to introduce a loxP site into the SpeI site (chr2:156956377-156956382) distal to exon 2 (chr2:156955586-156955652), a BamHI-SacII (chr2:156954488-156960865) subclone of pYC-AGS15 was generated in a pBluescript-II-SK (Stratagene) vector and the loxP site created in the SpeI site using 5'-phosphorylated primers YC-loxPF and YC-loxPR. The resulting insertions were verified by sequencing and the modified BamHI-SacII fragment was transferred back into pYC-AGS15 to generate pYC-AGS15-lox211.

To provide a positive selection marker and to introduce a loxP site into the BamHI site (chr2:156954488-156954493) proximal to exon 2, the neo-loxP cassette from pL451 (Liu et al, 2003) (modified by replacing the KpnI-EcoRI polylinker with a BglII site) was excised by BamHI + BglII digestion and ligated into the BamHI site to create plasmid pYC-AGS15-lox211-neo4. The orientation of the insert was verified by sequencing.

A negative selection marker (DTA) was then inserted at the *Samhd1*-vector junction by transferring the NotI-SalI fragment from pPGKdta (Soriano, 1997) into

the NotI-XhoI sites in the polylinker to generate pYC-AGS15-lox211-neo4-DTA3. This high copy number plasmid proved to be unstable when grown in large volume culture and the Samhd1-DTA insert was excised by AscI-NotI digestion and transferred to a low copy vector derived from pACYC177 (Chang & Cohen, 1978) by replacing the BstEII-BamHI fragment (b3279-3320, accession X06402) with an AscI-NotI linker to generate pACYC-AGSKO5-3. High quality DNA was prepared using a Qiagen Maxiprep kit following the manufacturers instructions. AscI digestion was used to generate linearized DNA for electroporation into ES cells.

All restriction enzymes with the exception of BshTI (Fermentas) were purchased from New England Biolabs. Genome positions are based on the NCBI37/mm9 build.

#### ES cell work

Gene targeting of ES cells was performed using standard techniques (Robertson, 1987). Two ES cell lines were used: (i) PRX-B6N #1, a C57BL/6N derived ES cell line obtained from Primogenix Inc., and (ii) a hybrid (129S6, C57BL/6J) ES cell line (S6/B6 Clone 2 produced at Cancer Research UK London Research Institute - Clare Hall).  $10^7$  cells were electroporated in DMEM with 20  $\mu$ g of linearized plasmids using voltage and capacitance settings of 240 V and 500  $\mu$ F, respectively. ES cells were plated onto 5 six well plates containing a layer of fibroblast feeder cells and were grown in ES cell culture media (DMEM, high glucose, with sodium pyruvate containing 15% (v/v) FCS Fetal Calf Serum, 2 mM Glutamine, 100x nonessential amino acids,  $10^{-4}$  M  $\beta$ -mercaptoethanol; 1000 IU/ml leukocyte inhibitory factor (LIF), 50 U/ml Pen/Strep). After 24 hours, the media was substituted with media containing geneticin sulphate (G418) to a final concentration of 300  $\mu$ g/ml. Selection was maintained for 7 – 8 days after which G418-resistant

colonies were isolated and expanded for freezing and DNA analysis by long-range PCR and Southern blot to identify homologous recombinants.

#### Chimera generation and breeding

To generate chimeric male founders, a targeted ES clone (5D6) derived from the PRX-B6N #1 cell line was injected into albino C57BL/6N (Tyrc-Brd) host blastocysts. The targeted ES clone (1F8) derived from the S6/B6 ES cell line was injected into C57BL/6J blastocyst. Chimeras from the PRX-B6N #1 (5D6) cell line were crossed to C57BL/6N (Tyrc-Brd) mice. Chimeras from the S6B6 cell line (1F8) were crossed to C57BL/6J mice. In both cases the appearance of black offspring indicated germ line transmission. This was confirmed by PCR using DNA extracted from ear biopsies and oligonucleotides YC-BamHIF and Neo 3' sense.

#### Crosses and genotyping

Crosses to transgenic lines expressing Cre and FLP recombinase (both C57BL/6 genetic background) are described in Fig. S1A. The *Samhd1* WT allele was identified by PCR using oligonucleotides A1494 and A485, and the *Samhd1 ko(neo)* and *ko* alleles using oligonucleotides A465-A487 and A465-A485, respectively. A detailed laboratory protocol is available upon request.

#### **Cells**

BM-DCs were obtained from fresh bone marrow using GM-CSF as described (Robinson et al, 2009). BM-DMs were grown using the same protocol, except that M-CSF (Peprotech, 20 ng/ml) or 20% L929 supernatant was used instead of GM-CSF. If not indicated otherwise, BM-DCs and BM-DMs were used for further experiments on day 6. Spleen cells were prepared by digestion with 1 mg/ml collagenase IV (Worthington, cat. nb. LS004188) and 0.2 mg/ml DNase I (Roche, cat. nb.

11284932001), followed by red blood cell lysis (Sigma, cat. nb. R7757). For primary MEFs, we crossed *Samhd1* +/- and *Samhd1* -/- animals and obtained cells from embryos at day 13.5 using standard techniques. The genotype of these cells was determined by PCR. MEFs were immortalized as described (Schulz et al, 2010).

NIH3T3 cells and MEFs were grown in DMEM medium. THP1 cells, RAW264.7 cells, BM-DCs, BMDMs and spleen cells were grown in RPMI 1640 medium. All media contained 10% FCS, 2 mM glutamine, 100 units/ml penicillin and 100 mg/ml streptomycin. 50 mM 2-mercaptoethanol was additionally added to RPMI medium.

## **RT Q-PCR**

RNA extraction from cells, reverse transcription and quantitative PCR have been described (Schulz et al, 2010). Mouse tissue samples were lysed in RLT-buffer (Qiagen, RNeasy mini kit) using glass beads (Sigma, G8772) and a FastPrep F120 instrument (Thermo; 6 m/s for 30 seconds or 2x30 seconds depending on tissue type). RNA was then extracted using the RNeasy mini kit (Qiagen, including Qias shredder and DNase treatment). Predeveloped Taqman assay reagents containing primers and fluorescent probe for murine *GAPDH*, *SAMHDI*, *IFIT1*, *IFIT2*, *IFI-44*, *IFN $\beta$* , *IL-6* and *TNF $\alpha$*  (all from Applied Biosystems) were used for quantitative PCR. Alternatively, we used SYBR Green Q-PCR mix from Invitrogen (cat. nb. P/N 56717) to detect the following transcripts: murine *SAMHDI* (primers from Qiagen, cat. nb. QT00150241; one of the primers is located in exon 2); murine *IL-1 $\beta$*  (primers from (Nolte et al, 2007)); MusD (primers from (Karimi et al, 2011)); IAP (primers from (Oakes et al, 2010)); Mu-ERV-L (primers from (Macfarlan et al, 2011)); and m-poly-MLV (primers from (Yoshinobu et al, 2009)).

## **Antibodies, Western blot, immunofluorescence and FACS**

Rabbits were immunized with recombinant, full-length and N-terminally 3xFLAG-tagged mSAMHD1 produced in and purified from insect cells using baculovirus technology. The resulting antiserum was used 1:100,000 in Western blot.  $\alpha$ -hSAMHD1 and  $\alpha$ -actin antibodies were from Abcam (cat. nb. 67820, 1:1,000) and Santa Cruz Biotechnology (cat. nb. sc-47778, 1:10,000). Secondary HRP-coupled antibodies were from Southern Biotech. For immunofluorescence, MEFs were grown in LabTekII chambers. Cells were fixed with 2% paraformaldehyde in PBS, permeabilized with 0.2% Triton X-100 in PBS and blocked with 5% FCS / 0.2% Triton X-100 in PBS for 90 min. The SAMHD1 anti-serum and control pre-immune serum were used 1:500 in blocking solution overnight at 4°C. Secondary goat- $\alpha$ -rabbit-Alexa633 antibody (Invitrogen A21072) was used 1:500 and DNA was stained with DAPI (1  $\mu$ g/ml). Images were acquired using a Zeiss Axiovert S100 inverted microscope with an Orca-ER camera (Hamamatsu).

For FACS analysis, cells were resuspended in ice cold FACS buffer (PBS containing 2 mM EDTA, 0.02% sodium azide and 1% FCS) and, if required, stained using the following antibodies, alone or in different combinations:  $\alpha$ -CD11c-PerCP-Cy5.5 (1:200; Biolegend cat. nb. 117328);  $\alpha$ -B220-PE (1:400; BD Biosciences cat. nb. 553090);  $\alpha$ -MHCII-eFluo.780 (1:200; E-Bioscience cat. nb. 47-5321-82);  $\alpha$ -F4/80 (1:300; Biolegend cat. nb. 122610);  $\alpha$ -CD11b-PerCP-Cy5.5 (1:300; BD Biosciences cat. nb. 550993);  $\alpha$ -Gr1-PE (1:400; BioLegend cat. nb. 108408);  $\alpha$ -NK1.1-Pe-Cy7 (1:200; E-Bioscience cat. nb. 25-5941-81);  $\alpha$ -CD3 APC (1:200; BD Biosciences cat. nb. 553066);  $\alpha$ -CD45-eFluo.780 (1:200; E-Bioscience cat. nb. 47-0451-80). Monoclonal antibody 83A25 was a kind gift from Stefan Bauer with

permission from Leonard Evans. PE- $\alpha$ -rat was from Jackson ImmunoResearch (1:200). DAPI (1  $\mu$ g/ml) was added to the samples immediately prior to data acquisition on Beckmann Coulter CyAn or BD Biosciences LSR II or LSRFortessa cell analysers. Data from at least  $2 \times 10^4$  and  $10^6$  cells were collected in *in vitro* and *in vivo* experiments, respectively.

### **IFN measurement**

We employed four different approaches to detect IFN in serum or cell culture supernatant samples:

- (i) ELISA for mouse IFN $\alpha$  (Schulz et al, 2010)
- (ii) LL171 bioassay (Rehwinkel et al, 2010)
- (iii) *IFIT1* mRNA induction in NIH3T3 cells. 50,000 NIH3T3 cells were seeded in 96-wells, incubated for 24 hours, and then exposed for 3 hours to 25  $\mu$ l sample (for example, serum). *IFIT1* transcript levels were quantified by RT Q-PCR. IFN-A/D (kind gift from I. Kerr) served as a standard.
- (iv) NIH3T3-ISRE-GFP bioassay. To generate an IFN reporter cell line, NIH3T3 cells were transduced with a lentivirus derived from pGreenFire-ISRE (System Biosciences), which expresses GFP in response to IFN. A stably transduced clone was selected and expanded. 25,000 NIH3T3-ISRE-GFP cells were seeded in 96-wells, incubated for 24 hours, and then exposed for 24 hours to 50  $\mu$ l sample. The fraction of GFP-expressing reporter cells was then determined by flow cytometry and compared to an IFN standard.

## **Cell stimulation**

25,000 MEFs were seeded in 24-well plates and, after 7 hours, transfected with Neo<sup>1-99</sup> IVT-RNA (Rehwinkel et al, 2010), poly dA:dT (Sigma cat. nb. P0833) or *E. coli* DNA (USB, cat. nb. 14380) using lipofectamine 2000 (Invitrogen). After 24 hours, culture supernatants were analyzed for the presence of IFN using the LL171 bioassay.

BM-DMs were seeded in 96-well plates (400,000 cells per well), incubated over night, transfected with IVT-RNA or c-di-GMP (Biolog; cat. nb. C 057) using lipofectamine 2000, and culture supernatants were collected 6 hours after transfection. IFN $\alpha$  was detected by ELISA.

## **Depletion of SAMHD1 using shRNAs**

BM-DCs were depleted of SAMHD1 using lentiviral shRNA delivery (target sequence CCCTCTCCTTATCAGAATCAT) as described previously (Robinson et al, 2009). On day 6, cells were transfected with water (“mock”) or *E. coli* DNA using lipofectamine 2000, and RNA was extracted after 24 hours for RT Q-PCR analysis.

## **Viruses**

EMCV was a kind gift from I. Kerr. Mo-MLV was produced as described before (Liberatore & Bieniasz, 2011). Ecotropic retroviral vectors expressing GFP (pFB-GFP and pMSCV-GFP) were made in Phoenix cells as described earlier (Sancho et al, 2009). VSV-G pseudotyped retroviral vectors that express GFP were produced in HEK293T cells transfected with three plasmids: the retroviral backbones pCNCG (MLV based) (Hatzioannou et al, 2003), pCSGW (HIV based) (Bainbridge et al, 2001) and pLL3.7 (Rubinson et al, 2003) were used in conjunction with p8.91

(lacking accessory genes) and pVSV-G; the HIV-1-based backbone pRRLsin.eGFP was used with pCMV $\Delta$ 8.2 (encoding Vif, Vpr, Vpu and Nef accessory proteins) or pCMV $\Delta$ 8.2 V148I and pVSV-G. The plasmids pRRLsin.eGFP, pCMV $\Delta$ 8.2 and pCMV $\Delta$ 8.2 V148I were a kind gift from Florence Margottin-Goguet. HEK293T supernatants were filtered (0.45  $\mu$ m) and, if required, concentrated by centrifugation. Titers of concentrated stocks were determined by infection of HEK293T cells with a dilution series of virus stocks, followed by FACS analysis of GFP expression. A detailed laboratory protocol is available upon request. The pCSGW / p8.91 and pRRLsin.eGFP / pCMV $\Delta$ 8.2 based lentiviral vectors are referred to as HIV-1-GFP in this manuscript.

### ***In vitro* infection models**

MEFs were seeded in 6-well plates and transduced in the presence of 8  $\mu$ g/ml polybrene (Sigma) by adding different dilutions of supernatants collected from 293T cells producing retroviral vectors or by adding concentrated and titrated virus stocks. In the latter case, multiplicities of infection (MOIs) were calculated based on 293T infectious units and are indicated in the figures. After 3 hours, the cell supernatant was replaced with fresh medium and cells were incubated for 24-48 hours. GFP expression was analyzed by flow cytometry.

Fresh bone marrow, fresh spleen cells and differentiated BM-DCs and BM-DMs were all transduced by a single round of spin-infection in the presence of 4  $\mu$ g/ml polybrene. Retroviral vectors were added to cells in 6-well or 24-well dishes, and plates were then spun at room temperature for 90 minutes at 2500 rpm. Supernatants were replaced with fresh medium after centrifugation. GFP expression was analyzed by flow cytometry after 24 hours (fresh spleen cells and differentiated



BM-DCs and BM-DMs) or after 6 days of GM-CSF culture (fresh bone marrow). Fresh bone marrow and fresh spleen cells were transduced using different dilutions of supernatants collected from 293T cells producing retroviral vectors. BM-DCs and BM-DMs were transduced with concentrated stocks of these vectors and MOIs were calculated based on 293T infectious units and are indicated in the figures.

### ***In vivo* infection models**

#### EMCV

Mice were infected with  $10^6$  plaque-forming units of EMCV in PBS by intraperitoneal injection. Serum was collected from animals sacrificed 24 hours after infection and IFN $\alpha$  was detected by ELISA.

#### Mo-MLV

*Samhd1* +/- and *Samhd1* -/- animals were crossed and neonates were infected with Mo-MLV (Liberatore & Bieniasz, 2011) 1 day after birth (intraperitoneal injection of  $2 \times 10^5$  focus forming units in PBS). After 14 days, animals were sacrificed. DNA extracted from tail samples was used to determine the genotype by PCR. Virus titers in serum samples were determined using the following protocol. 8000 NIH3T3 cells were seeded in 96-well plates and infected with serum dilutions the next day in the presence of 4  $\mu$ g/ml polybrene. After 48 hours, the cells were fixed with ice-cold acetone : methanol (50:50) for 5 hours at 4°C, washed 3 x with PBS, and stained for 2 hours with S/N from 1912 hybridoma cells (Chesebro et al, 1983) diluted 1:20 in PBS / 1% FCS. Cells were then washed 3 x with PBS, the secondary antibody was added for 1 hour (goat- $\alpha$ -mouse  $\beta$ -galactosidase conjugate; Southern Biotech cat. nb. 1010-06; 1:400 in PBS / 1% FCS), and cells were washed 3 x with PBS. Substrate solution (PBS containing 1 mg/ml X-Gal; 5 mM  $K_3Fe(CN)_6$ ; 5 mM  $K_4Fe(CN)_6 \cdot 3H_2O$ ; 2 mM

MgCl<sub>2</sub>) was added and the number of blue foci (indicating the presence of Mo-MLV capsid protein and thus infection of the cell) was determined microscopically after over-night incubation at 37°C.

#### HIV-1-GFP

Mice were infected with  $5 \times 10^7$  to  $10^8$  infectious units HIV-1-GFP by intravenous injection. 5 to 6 days post infection, animals were sacrificed, spleens collected and digested and splenocytes were analyzed by flow cytometry (Rowe et al, 2006).

#### **Virus-like particles**

VSV-G pseudotyped virus-like particles were produced by transfecting HEK293T cells with pSIV3+ (Vpx sufficient) or pSIV4+ (Vpx deficient)(Negre et al, 2000) and pVSV-G. HEK293T supernatants were filtered (0.45 µm).  $5 \times 10^5$  THP1 cells were seeded in 24-well plates and treated with 30 ng/ml PMA for 24 hours. VLPs were added to PMA-treated THP-1 cells or BM-DCs and BMDMs, and cells were spin-infected as above in the presence of 4 µg/ml polybrene. After 24 hours, cell lysates were prepared for Western blot analysis.

#### **dNTP measurement**

Extracts were prepared from BM-DCs and BM-DMs following a published protocol (Wilson et al, 2011). The single nucleotide incorporation (primer extension) assay was performed as described in the literature (Diamond et al, 2004) using extract from 1 million cells per reaction. A Typhoon 9400 phosphoimager (Amersham) was used to scan dried polyacrylamide gels. The fluorescence-based assay was carried out as published (Wilson et al, 2011) on a light cycler (ABI 7500, Applied Biosciences)

using extract from 1 million cells per reaction. Normalized fluorescence units were calculated by subtracting background values (H<sub>2</sub>O only) from sample values after 20 cycles. A dTTP dilution series was used as a standard to determine the number of dTTP molecules per BM-DC sample. These values were converted into intracellular dTTP concentrations based on the cell volume of BM-DCs. This was determined to be 2244  $\mu\text{m}^3$  by measuring the average diameter of 100 cells by confocal microscopy and is based on the assumption that the cells are spherical.

## Oligonucleotides

| oligonucleotide           | sequence 5' -> 3'                        |
|---------------------------|------------------------------------------|
| YC-1F                     | ACATGGTTCACTACAGTAGGTTC                  |
| YC-2R                     | TACAGTACAGGCTAACACAAGTC                  |
| YC-loxPF                  | CTAGATAACTTCGTATAATGTATGCTATACGAAGTTAT   |
| YC-loxPR                  | CTAG ATAACTTCGTATAGCATAACATTATACGAAGTTAT |
| YC-BamHIF                 | GACTTGTGTTAGCCTGTACTGTA                  |
| IL-1b F                   | CAACCAACAAGTGATATTCTCCATG                |
| IL-1b R                   | GATCCCACTCTCCAGCTGCA                     |
| Neo 3' sense              | GCTCCCGATTTCGCAGCGCATC                   |
| A1494                     | TTTGGTTCTAGGCACTCTTCTG                   |
| A485                      | TCTCCTTATGGATGGTTGTAAGCC                 |
| A465                      | TCTGCATGGATTTCAAGGATAGC                  |
| A487                      | ATCAGTCAGGTACATAATAACTTCGT               |
| MusD F                    | GTGCTAACCCAACGCTGGTTC                    |
| MusD R                    | CTCTGGCCTGAAACAACCTCCTG                  |
| IAP-Forward               | ATAATCTGCGCATGAGCCAAGG                   |
| IAP-Reverse               | AGGAAGAACACCACAGACCAGA                   |
| MuERV-L F                 | ATCTCCTGGCACCTGGTATG                     |
| MuERV-L R                 | AGAAGAAGGCATTTGCCAGA                     |
| polyMLV F                 | CCGCCAGGTCCTCAATATAG                     |
| mpolyMLV R                | CGTCCCAGGTTGTATAGAGG                     |
| XhoI-kozak-<br>mSamhd1-F1 | actcgagGCCGCCatgcagagcacccttgagcag       |
| mAGS5-R 411               | GATGATTCTGATAAGGAGAGGGTG                 |
| mSamhd1-F exon 2          | TTTGGATGAGGATCGTCTGG                     |
| EcoRI-mSamhd1-<br>isof1-R | agaattcTTAAAATTTTAGACATGTTTTTACT         |
| EcoRI-mSamhd1-<br>isof2-R | agaattcTTACAGCTGGTTGTGAGCCG              |

## Supplementary References

Bainbridge JW, Stephens C, Parsley K, Demaison C, Halfyard A, Thrasher AJ, Ali RR (2001) In vivo gene transfer to the mouse eye using an HIV-based lentiviral vector; efficient long-term transduction of corneal endothelium and retinal pigment epithelium. *Gene therapy* **8**: 1665-1668

Chang AC, Cohen SN (1978) Construction and characterization of amplifiable multicopy DNA cloning vehicles derived from the P15A cryptic miniplasmid. *Journal of bacteriology* **134**: 1141-1156

Chesebro B, Britt W, Evans L, Wehrly K, Nishio J, Cloyd M (1983) Characterization of monoclonal antibodies reactive with murine leukemia viruses: use in analysis of strains of friend MCF and Friend ecotropic murine leukemia virus. *Virology* **127**: 134-148

Diamond TL, Roshal M, Jamburuthugoda VK, Reynolds HM, Merriam AR, Lee KY, Balakrishnan M, Bambara RA, Planelles V, Dewhurst S, Kim B (2004) Macrophage tropism of HIV-1 depends on efficient cellular dNTP utilization by reverse transcriptase. *The Journal of biological chemistry* **279**: 51545-51553

Hatzioannou T, Cowan S, Goff SP, Bieniasz PD, Towers GJ (2003) Restriction of multiple divergent retroviruses by Lv1 and Ref1. *The EMBO journal* **22**: 385-394

Karimi MM, Goyal P, Maksakova IA, Bilenky M, Leung D, Tang JX, Shinkai Y, Mager DL, Jones S, Hirst M, Lorincz MC (2011) DNA methylation and SETDB1/H3K9me3 regulate predominantly distinct sets of genes, retroelements, and chimeric transcripts in mESCs. *Cell stem cell* **8**: 676-687

Liberatore RA, Bieniasz PD (2011) Tetherin is a key effector of the antiretroviral activity of type I interferon in vitro and in vivo. *Proceedings of the National Academy of Sciences of the United States of America* **108**: 18097-18101

Liu P, Jenkins NA, Copeland NG (2003) A highly efficient recombineering-based method for generating conditional knockout mutations. *Genome research* **13**: 476-484

Macfarlan TS, Gifford WD, Agarwal S, Driscoll S, Lettieri K, Wang J, Andrews SE, Franco L, Rosenfeld MG, Ren B, Pfaff SL (2011) Endogenous retroviruses and neighboring genes are coordinately repressed by LSD1/KDM1A. *Genes & development* **25**: 594-607

Negre D, Mangeot PE, Duisit G, Blanchard S, Vidalain PO, Leissner P, Winter AJ, Rabourdin-Combe C, Mehtali M, Moullier P, Darlix JL, Cosset FL (2000) Characterization of novel safe lentiviral vectors derived from simian immunodeficiency virus (SIVmac251) that efficiently transduce mature human dendritic cells. *Gene therapy* **7**: 1613-1623

Nolte MA, Leibundgut-Landmann S, Joffre O, Reis e Sousa C (2007) Dendritic cell quiescence during systemic inflammation driven by LPS stimulation of radioresistant cells in vivo. *The Journal of experimental medicine* **204**: 1487-1501

Oakes B, Tai AK, Cingoz O, Henefield MH, Levine S, Coffin JM, Huber BT (2010) Contamination of human DNA samples with mouse DNA can lead to false detection of XMRV-like sequences. *Retrovirology* **7**: 109

Osoegawa K, Tateno M, Woon PY, Frengen E, Mammoser AG, Catanese JJ, Hayashizaki Y, de Jong PJ (2000) Bacterial artificial chromosome libraries for mouse sequencing and functional analysis. *Genome research* **10**: 116-128

Rehwinkel J, Tan CP, Goubau D, Schulz O, Pichlmair A, Bier K, Robb N, Vreede F, Barclay W, Fodor E, Reis e Sousa C (2010) RIG-I detects viral genomic RNA during negative-strand RNA virus infection. *Cell* **140**: 397-408

Robertson EJ (1987) *Tetracarcinomas and Embryonic Stem Cells: A Practical Approach.*, Oxford: IRL Press.

Robinson MJ, Osorio F, Rosas M, Freitas RP, Schweighoffer E, Gross O, Verbeek JS, Ruland J, Tybulewicz V, Brown GD, Moita LF, Taylor PR, Reis e Sousa C (2009) Dectin-2 is a Syk-coupled pattern recognition receptor crucial for Th17 responses to fungal infection. *The Journal of experimental medicine* **206**: 2037-2051

Rowe HM, Lopes L, Ikeda Y, Bailey R, Barde I, Zenke M, Chain BM, Collins MK (2006) Immunization with a lentiviral vector stimulates both CD4 and CD8 T cell responses to an ovalbumin transgene. *Molecular therapy : the journal of the American Society of Gene Therapy* **13**: 310-319

Rubinson DA, Dillon CP, Kwiatkowski AV, Sievers C, Yang L, Kopinja J, Rooney DL, Zhang M, Ihrig MM, McManus MT, Gertler FB, Scott ML, Van Parijs L (2003) A lentivirus-based system to functionally silence genes in primary mammalian cells, stem cells and transgenic mice by RNA interference. *Nature genetics* **33**: 401-406

Sancho D, Joffre OP, Keller AM, Rogers NC, Martinez D, Hernanz-Falcon P, Rosewell I, Reis e Sousa C (2009) Identification of a dendritic cell receptor that couples sensing of necrosis to immunity. *Nature* **458**: 899-903

Schulz O, Pichlmair A, Rehwinkel J, Rogers NC, Scheuner D, Kato H, Takeuchi O, Akira S, Kaufman RJ, Reis e Sousa C (2010) Protein kinase R contributes to immunity against specific viruses by regulating interferon mRNA integrity. *Cell host & microbe* **7**: 354-361

Soriano P (1997) The PDGF alpha receptor is required for neural crest cell development and for normal patterning of the somites. *Development* **124**: 2691-2700

Wilson PM, Labonte MJ, Russell J, Louie S, Ghobrial AA, Ladner RD (2011) A novel fluorescence-based assay for the rapid detection and quantification of cellular deoxyribonucleoside triphosphates. *Nucleic acids research* **39**: e112

Yanisch-Perron C, Vieira J, Messing J (1985) Improved M13 phage cloning vectors and host strains: nucleotide sequences of the M13mp18 and pUC19 vectors. *Gene* **33**: 103-119

Yoshinobu K, Baudino L, Santiago-Raber ML, Morito N, Dunand-Sauthier I, Morley BJ, Evans LH, Izui S (2009) Selective up-regulation of intact, but not defective env RNAs of endogenous modified polytropic retrovirus by the Sgp3 locus of lupus-prone mice. *J Immunol* **182**: 8094-8103

# Supplementary Figure 1

**A**

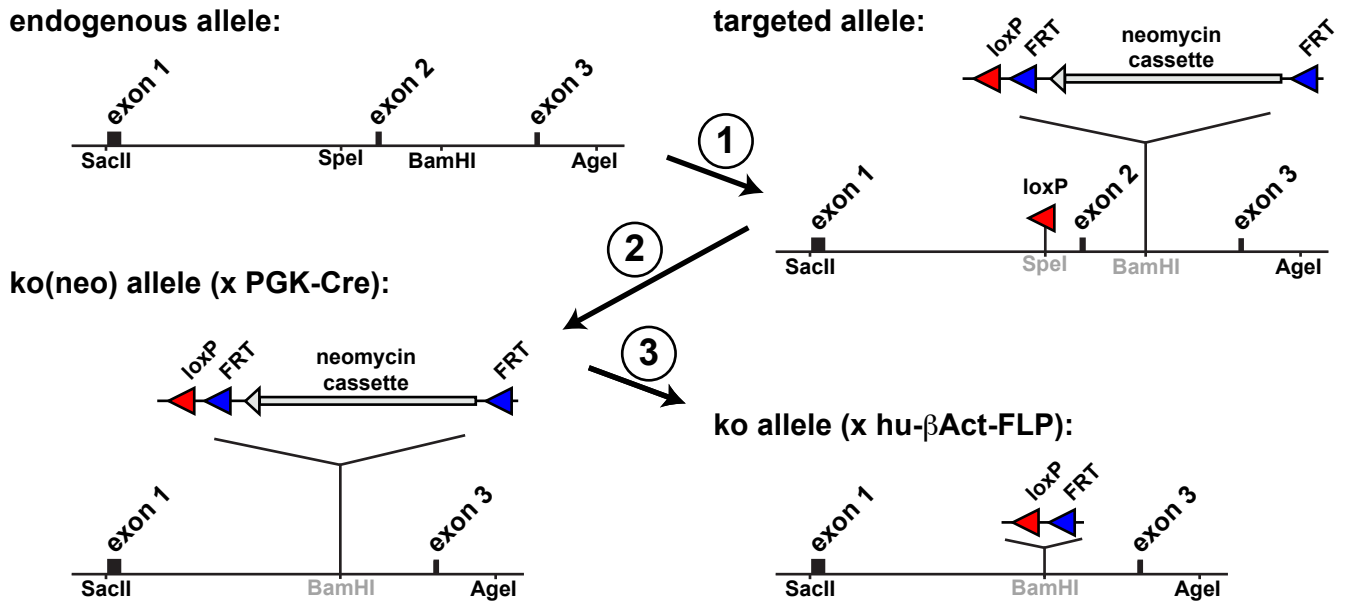

**B**

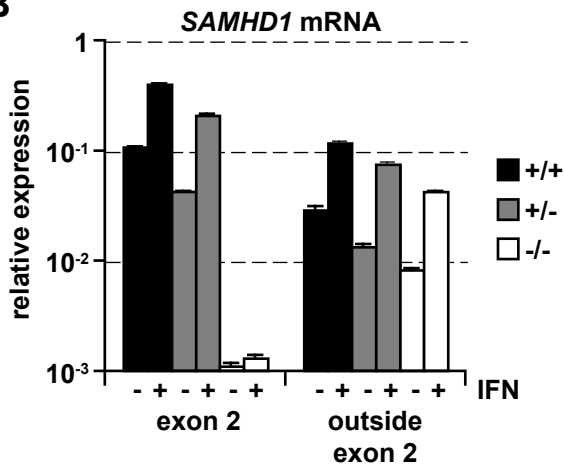

**C**

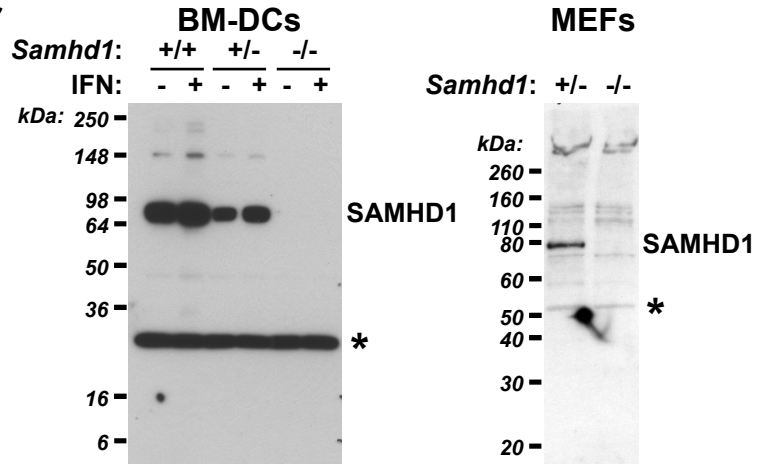

**D**

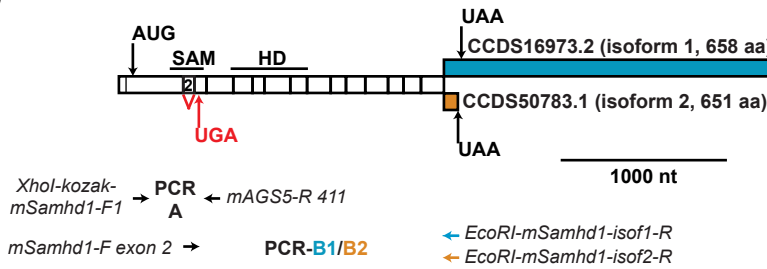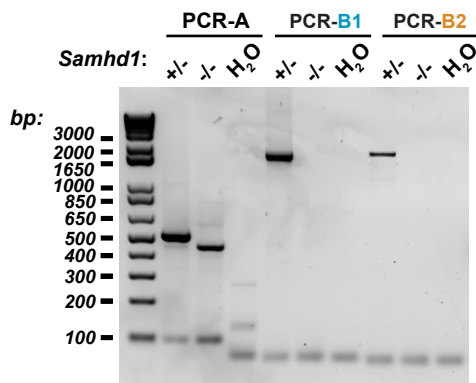

**E**

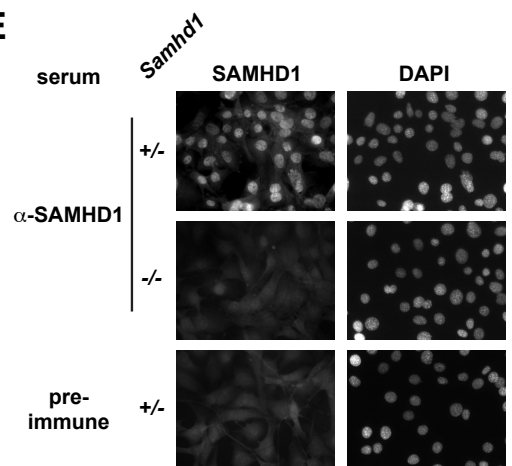

**F**

| Background  | +/+ | +/- | -/- |
|-------------|-----|-----|-----|
| B6 (neo)    | 27  | 45  | 14  |
| B6          | 18  | 33  | 21  |
| S6/B6 (neo) | 28  | 51  | 28  |
| S6/B6       | 13  | 20  | 6   |



## Supplementary Figure 2

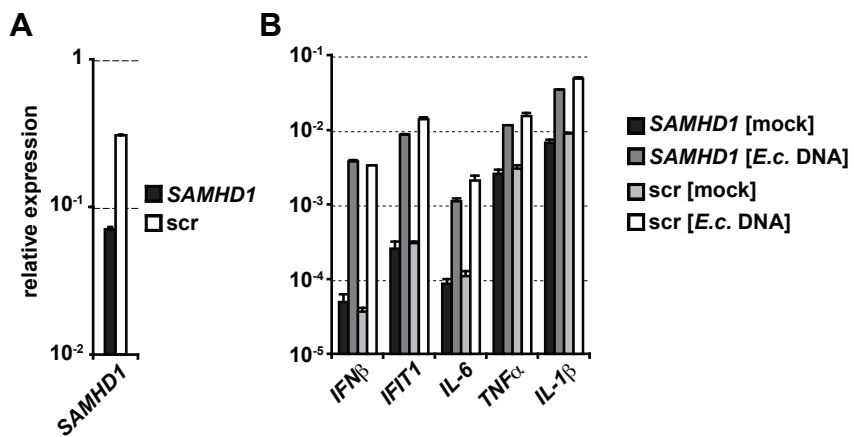

### Supplementary Figure 3

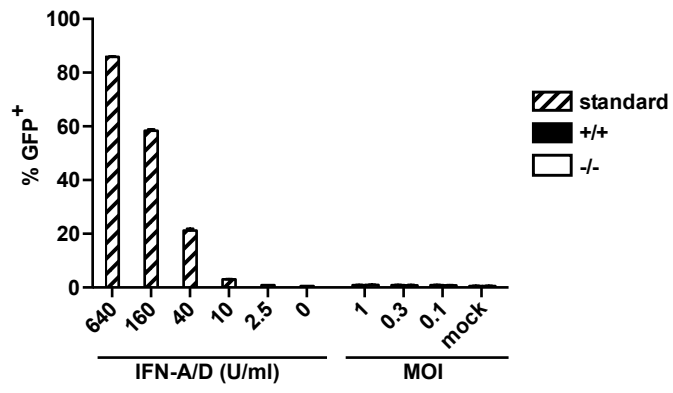

# Supplementary Figure 4

**A**

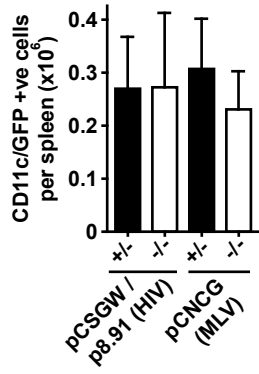

**B**

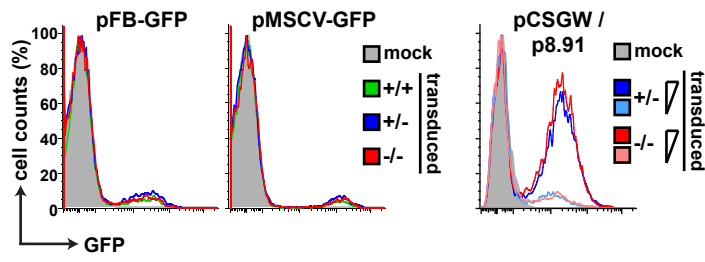

**C**

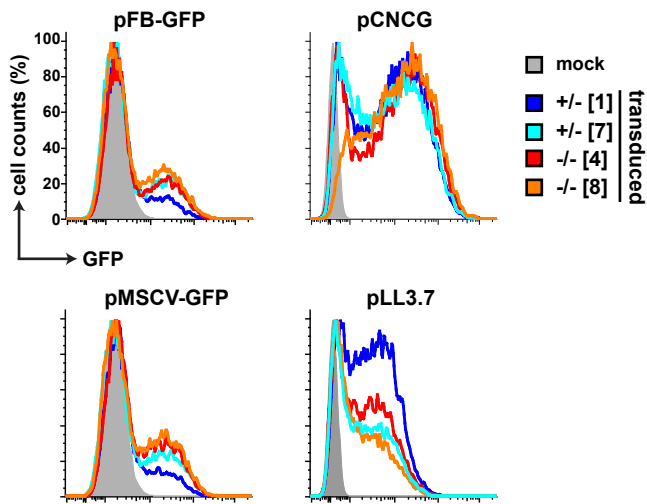

Supplementary Figure 5

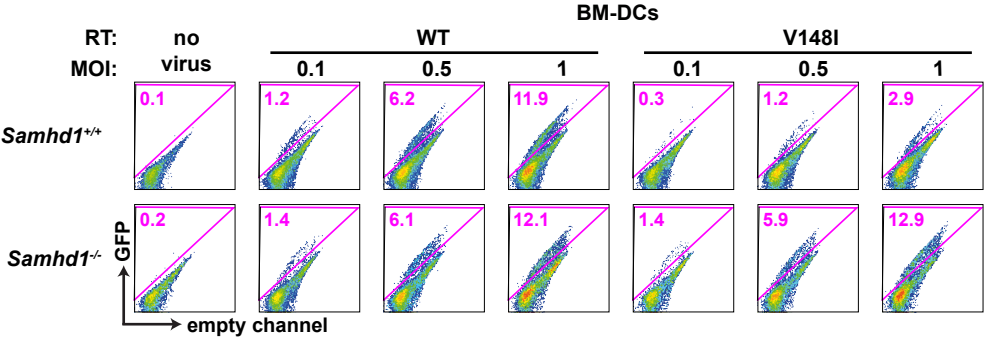

## Supplementary Figure 6

### stain I

DAPI  
 CD3-APC  
 NK1.1-PE-Cy7  
 CD11b-PerCP-Cy5.5  
 Gr1-PE

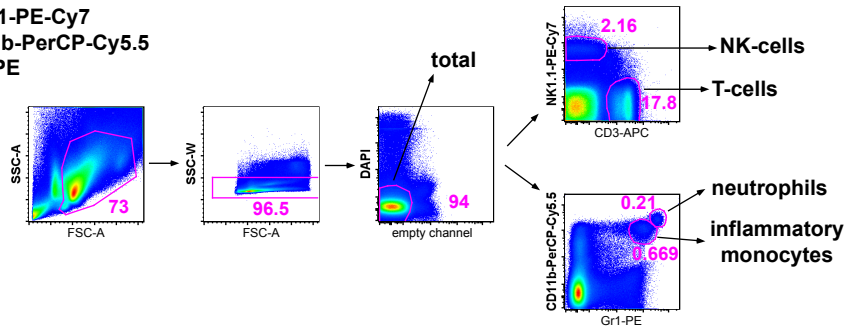

### stain II

DAPI  
 B220-PE  
 CD11c-PerCP-Cy5.5  
 MHCII-eFluo.780  
 F4/80-AF647

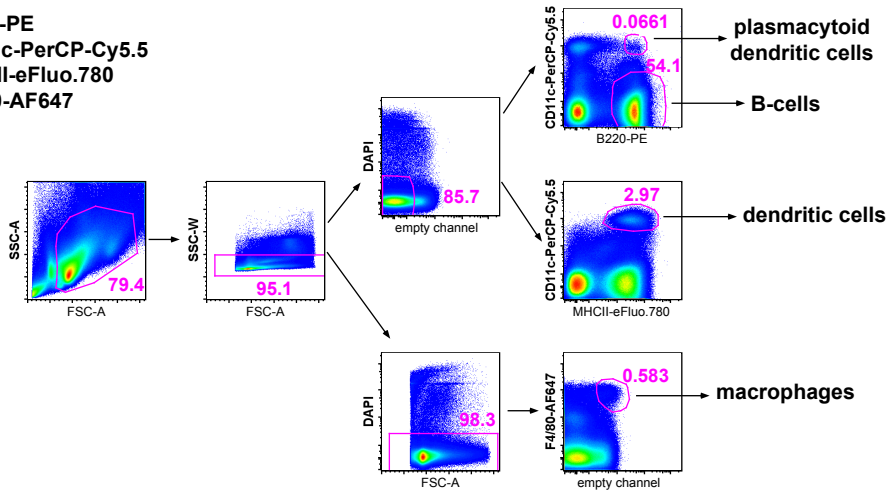

Supplementary Figure 7

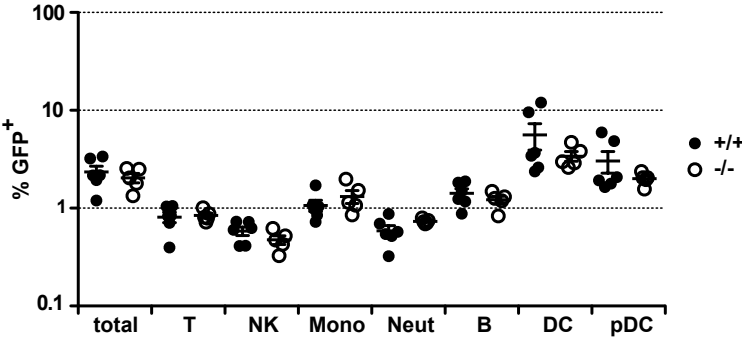

# Supplementary Figure 8

1 ----- MQRADSEQPSKRPRCD DSP hSAMHD1  
1 MDSLLGCGVSAAREPVPRYLTSQPRVSEVAMQSA PL EQPAKRPRCDGSP mSAMHD1 - isoform 1  
1 MDSLLGCGVSAAREPVPRYLTSQPRVSEVAMQSA PL EQPAKRPRCDGSP mSAMHD1 - isoform 2

20 RTPSNTPSAEADWSPGLELH- PDYKTWGPEQVCSF LRRGGFEEPVLLKNI  
51 RTPPSTPPATANLSADDDFQNTDLRTWEPEDVCSFLENRGREREKKVLDIF  
51 RTPPSTPPATANLSADDDFQNTDLRTWEPEDVCSFLENRGREREKKVLDIF

69 RENEI TGALLPCLDESRFENLGVSSLGERKKLLSYI QRLVQI HVDTMKVI  
101 RDNKI AGSFLPFLDEDRLEDLGVSSLEERKKMIECI QQLSQSRI DLMKVF  
101 RDNKI AGSFLPFLDEDRLEDLGVSSLEERKKMIECI QQLSQSRI DLMKVF

119 NDPIHGHI ELHPLLVRI IDTPQFQRLRYI KQLGGGYVFPGASHNRF EHS  
151 NDPIHGHI EFHPLLIRI IDTPQFQRLRYI KQLGGGYVFPGASHNRF EHS  
151 NDPIHGHI EFHPLLIRI IDTPQFQRLRYI KQLGGGYVFPGASHNRF EHS

169 LGVGYLAGCLVHALGEKQPELQI SERDVL CVQI AGLCHDLGHGPF SHMFD  
201 LGVGYLAGCLV RALA EKQPELQI SERD L CVQI AGLCHDLGHGPF SHMFD  
201 LGVGYLAGCLV RALA EKQPELQI SERD L CVQI AGLCHDLGHGPF SHMFD

219 GRFI PLARPEVKWTHEQGSVMMFEHLI NSNGI KPVMEQYGLIPEEDI CFI  
251 GRFI PRARPEK KWKHEQGS IEMFEHLVNSNELKLV MKNYGLVP EEDI TFI  
251 GRFI PRARPEK KWKHEQGS IEMFEHLVNSNELKLV MKNYGLVP EEDI TFI

269 KEQI VGP LESPVEDSLWPYKGRP ENKSFLYEI VSNKRNGI DVDKWDYFAR  
301 KEQI MGPPI TPVKDSLWPYKGRP ATKSFLYEI VSNKRNGI DVDKWDYFAR  
301 KEQI MGPPI TPVKDSLWPYKGRP ATKSFLYEI VSNKRNGI DVDKWDYFAR

319 DCHHLGI QNFDYKRFI KFARVCEVDNELR- - - - - CARDKEVG  
351 DCHHLGI QNFDYKRFI KFARI CEVEYKVKEDKTYI RKV KHI CSREKEVG  
351 DCHHLGI QNFDYKRFI KFARI CEVEYKVKEDKTYI RKV KHI CSREKEVG

358 NLYDMFHTRNSLHRRAYQHKGNI IDTMI TDAFLKADDYI EITGAGGKKY  
401 NLYDMFHTRNCLHRRAYQHKI SNLI DMI TDAFLKADPYVEITGTAGKKF  
401 NLYDMFHTRNCLHRRAYQHKI SNLI DMI TDAFLKADPYVEITGTAGKKF

408 RI STAI DDMEA YTKLTDNI FLEI LYSTDPKL KDAREI LKQI EYRNLFKYV  
451 RI STAI DDMEA FTKLTDNI FLEV LHSTDPQL SEAQSI LRNI ECRNLYKYL  
451 RI STAI DDMEA FTKLTDNI FLEV LHSTDPQL SEAQSI LRNI ECRNLYKYL

458 GETQP TGQI KI KREDYESLPKEVASAKPKVL LDVCLKAEDFI VDVI NMDY  
501 GETQP K- REKI RKEEYERLPQEVAKAKPEKAPDVE LKAEDFI VDVI NVDY  
501 GETQP K- REKI RKEEYERLPQEVAKAKPEKAPDVE LKAEDFI VDVI NVDY

508 GMQEKNPI DHVSFYCKTAPNRAI RI TKNQVSQLLPEKFAEQLI RVYCKKV  
550 GMEDKNPI DRVHFYCKSNSKQAVRI NKEQVSQLLPEKFAEQLI RVYCKK  
550 GMEDKNPI DRVHFYCKSNSKQAVRI NKEQVSQLLPEKFAEQLI RVYCKK

558 DRKSL YAARQYFVQWCADRNF TKPQDGDVI APLITPQKKEWNDSTSVQNP  
600 DGKSL DAAGKH FVQWCA LRDFTKPQDGD I APLITPLKWNKTS SCLQEV  
600 DGKSL DAAGKH FVQWCA LRDFTKPQDGD - - - - - AGEMAE DPDSI PSTQQP

608 TRLREASKSRVQLFKDDPM.  
650 SKVKTCLKF.  
645 HAAHNQL.

## Supplementary Figure 9

**A**

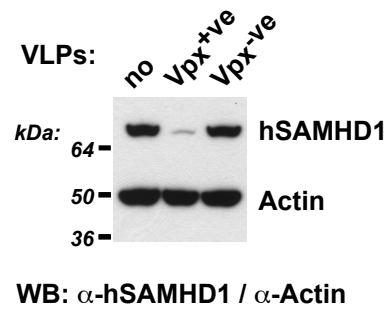

**B**

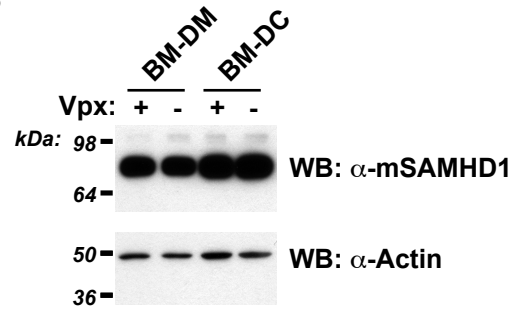

Supplement: emboj2013163s1.pdf [file emboj2013163s1.pdf]
